# Supplementary material for: Multidimensional Personality Changes Following Psilocybin-Assisted Therapy in Patients With Alcohol Use Disorder: Results From a Double-Blind, Placebo-Controlled Clinical Trial
Source: Atypon-hosted journal article supplement (doi:10.1176/appi.ajp.20230887), 2025-01-01
Supplement: appi.ajp.20230887.ds001.pdf [file appi.ajp.20230887.ds001.pdf]

Data supplement for Pagni et al., Multidimensional Personality Changes Following Psilocybin-Assisted Therapy in Patients With Alcohol Use Disorder: Results From a Double-Blind, Placebo-Controlled Clinical Trial. *Am J Psychiatry* (doi: 10.1176/appi.ajp.20230887)

**TABLE S1.** Participant demographics and self-report means, standard deviations, and ranges

|                                               | Psilocybin ( <i>n</i> = 44) |         | Placebo ( <i>n</i> = 40) |         | Group differences  |              |
|-----------------------------------------------|-----------------------------|---------|--------------------------|---------|--------------------|--------------|
|                                               | Male                        | Female  | Male                     | Female  |                    |              |
| <b>Sex (ASAB)</b>                             |                             |         |                          |         | $\chi^2(1) = 0.02$ | $p = 0.88$   |
|                                               | 26                          | 18      | 23                       | 17      |                    |              |
| <b>Ethnicity</b>                              | <i>N</i>                    | %       | <i>N</i>                 | %       | $\chi^2(4) = 4.30$ | $p = 0.366$  |
| Hispanic                                      | 4                           | 9.09%   | 7                        | 17.50%  |                    |              |
| White                                         | 34                          | 77.27%  | 31                       | 77.50%  |                    |              |
| Black                                         | 2                           | 4.54%   | 0                        | 0%      |                    |              |
| Asian                                         | 3                           | 6.81%   | 0                        | 0%      |                    |              |
| American Indian                               | 0                           | 0%      | 1                        | 2.50%   |                    |              |
| Other                                         | 1                           | 2.27%   | 1                        | 2.50%   |                    |              |
|                                               | M                           | SD      | M                        | SD      |                    |              |
| <b>Age, years</b>                             | 47.34                       | 10.79   | 44.03                    | 12.05   | $t(82) = -1.33$    | $p = 0.19$   |
| <b>Weight (lbs)</b>                           | 174.26                      | 32.88   | 170.10                   | 35.77   | $t(82) = -0.56$    | $p = 0.58$   |
| <b>Income</b>                                 | 266,655                     | 659,679 | 147,676                  | 119,957 | $t(70) = 3.76$     | $p = 0.057$  |
| <b>BL Neuroticism<sup>a</sup></b>             | 91.11                       | 21.70   | 99.88                    | 27.26   | $t(82) = 1.64$     | $p = 0.11$   |
| <b>BL Extraversion<sup>a</sup></b>            | 104.55                      | 20.79   | 107.73                   | 17.76   | $t(82) = 0.75$     | $p = 0.46$   |
| <b>BL Openness<sup>a</sup></b>                | 129.59                      | 16.65   | 140.60                   | 20.69   | $t(82) = 2.70$     | $p = 0.01^*$ |
| <b>BL Conscientiousness<sup>a</sup></b>       | 113.89                      | 22.64   | 101.28                   | 23.40   | $t(82) = -2.51$    | $p = 0.01^*$ |
| <b>BL Agreeableness<sup>a</sup></b>           | 123.23                      | 16.13   | 121.90                   | 14.86   | $t(82) = -0.39$    | $p = 0.70$   |
| <b>Pre-to-Post Changes in DpD<sup>b</sup></b> | -1.14                       | 2.01    | -0.32                    | 1.03    | $F(1,83) = 5.41$   | $p = 0.023$  |
| <b>Post-Treatment DpD<sup>b</sup></b>         | 1.37                        | 1.73    | 1.95                     | 1.93    | $F(1,83) = 2.11$   | $p = 0.15$   |

ASAB = assigned sex at birth; M = mean; SD = standard deviation; <sup>a</sup> = NEO-PI; <sup>b</sup> = TLFB; DpD = drinks per day; \* $p < 0.05$

**TABLE S2.** Effects of placebo + psychotherapy treatment on personality facets

|                          | Placebo |      |       |      | Effect of Time  |              |
|--------------------------|---------|------|-------|------|-----------------|--------------|
|                          | Pre     |      | Post  |      |                 |              |
|                          | Mean    | SD   | Mean  | SD   |                 |              |
| <b>Neuroticism</b>       |         |      |       |      |                 |              |
| Anxiety                  | 17.55   | 6.84 | 18.02 | 6.41 | $t(39) = -0.83$ | $p = 0.41$   |
| Anger Hostility          | 14.65   | 6.55 | 14.18 | 6.07 | $t(39) = 0.82$  | $p = 0.42$   |
| Depression               | 18.83   | 6.71 | 19.02 | 7.37 | $t(39) = -0.33$ | $p = 0.74$   |
| Self-consciousness       | 16.40   | 5.43 | 16.02 | 5.78 | $t(39) = 0.80$  | $p = 0.43$   |
| Impulsiveness            | 20.27   | 4.62 | 20.15 | 4.87 | $t(39) = 0.29$  | $p = 0.78$   |
| Vulnerability            | 12.18   | 5.28 | 12.38 | 5.22 | $t(39) = -0.44$ | $p = 0.66$   |
| <b>Extraversion</b>      |         |      |       |      |                 |              |
| Warmth                   | 22.58   | 5.00 | 22.18 | 4.74 | $t(39) = 0.97$  | $p = 0.34$   |
| Gregariousness           | 15.43   | 5.69 | 15.20 | 5.36 | $t(39) = 0.48$  | $p = 0.63$   |
| Assertiveness            | 15.95   | 4.91 | 16.20 | 4.89 | $t(39) = -0.61$ | $p = 0.55$   |
| Activity                 | 16.95   | 3.57 | 17.08 | 3.29 | $t(39) = -0.27$ | $p = 0.79$   |
| Excitement-seeking       | 17.73   | 4.81 | 17.35 | 4.72 | $t(39) = 0.82$  | $p = 0.42$   |
| Positive emotions        | 19.10   | 6.42 | 17.80 | 7.03 | $t(39) = 2.46$  | $p = 0.02^*$ |
| <b>Openness</b>          |         |      |       |      |                 |              |
| Fantasy                  | 21.58   | 5.95 | 22.08 | 5.42 | $t(39) = -0.90$ | $p = 0.37$   |
| Aesthetics               | 22.48   | 6.03 | 21.88 | 6.46 | $t(39) = 1.24$  | $p = 0.22$   |
| Feelings                 | 24.08   | 4.56 | 23.33 | 4.62 | $t(39) = 1.56$  | $p = 0.13$   |
| Actions                  | 20.15   | 5.02 | 19.55 | 5.12 | $t(39) = 1.45$  | $p = 0.15$   |
| Ideas                    | 24.50   | 4.79 | 24.40 | 4.64 | $t(39) = 0.26$  | $p = 0.80$   |
| Values                   | 27.83   | 3.32 | 26.18 | 3.51 | $t(39) = 3.55$  | $p < 0.01^*$ |
| <b>Agreeableness</b>     |         |      |       |      |                 |              |
| Trust                    | 18.88   | 5.24 | 18.08 | 5.76 | $t(39) = 1.49$  | $p = 0.15$   |
| Straightforwardness      | 18.23   | 5.20 | 17.83 | 4.34 | $t(39) = 0.76$  | $p = 0.45$   |
| Altruism                 | 23.38   | 3.73 | 22.98 | 3.61 | $t(39) = 0.88$  | $p = 0.40$   |
| Compliance               | 16.50   | 4.55 | 16.95 | 4.24 | $t(39) = -0.89$ | $p = 0.38$   |
| Modesty                  | 19.93   | 4.77 | 20.08 | 4.25 | $t(39) = -0.26$ | $p = 0.79$   |
| Tender-mindedness        | 25.00   | 4.22 | 24.90 | 4.38 | $t(39) = 0.19$  | $p = 0.85$   |
| <b>Conscientiousness</b> |         |      |       |      |                 |              |
| Competence               | 19.80   | 4.43 | 20.27 | 4.05 | $t(39) = -1.01$ | $p = 0.32$   |
| Dutifulness              | 18.60   | 4.53 | 19.05 | 4.36 | $t(39) = -0.79$ | $p = 0.43$   |
| Achievement              | 18.18   | 5.67 | 18.77 | 6.02 | $t(39) = -1.42$ | $p = 0.16$   |
| Self-discipline          | 14.68   | 5.67 | 15.13 | 5.79 | $t(39) = -0.78$ | $p = 0.44$   |
| Deliberation             | 14.48   | 4.06 | 14.85 | 3.98 | $t(39) = -0.63$ | $p = 0.54$   |
| Order                    | 15.55   | 5.93 | 16.15 | 6.53 | $t(39) = -1.11$ | $p = 0.27$   |

Pre- and post-intervention means, standard deviations (*SD*), and within-placebo group *t*-tests; \* $p < 0.05$

**TABLE S3.** Site demographics and baseline means and standard deviations

| <b>Sex</b>                              | <b>NYU (n=74)</b> |               | <b>UNM (n=10)</b> |               | <b>Group differences</b> |              |
|-----------------------------------------|-------------------|---------------|-------------------|---------------|--------------------------|--------------|
|                                         | <b>Male</b>       | <b>Female</b> | <b>Male</b>       | <b>Female</b> |                          |              |
|                                         | 43                | 31            | 6                 | 4             | $\chi^2(1) = 0.01$       | $p = 0.91$   |
| <b>Ethnicity</b>                        | <b>N</b>          | <b>%</b>      | <b>N</b>          | <b>%</b>      | $\chi^2(4)=15.72$        | $p = 0.01^*$ |
| Hispanic                                | 7                 | 9.46%         | 4                 | 40.00%        |                          |              |
| White                                   | 60                | 81.08%        | 5                 | 50.00%        |                          |              |
| Black                                   | 2                 | 2.70%         | 0                 | 0%            |                          |              |
| Asian                                   | 3                 | 4.05%         | 0                 | 0%            |                          |              |
| American Indian                         | 0                 | 0%            | 1                 | 10.00%        |                          |              |
| Other                                   | 2                 | 2.70%         | 0                 | 0%            |                          |              |
|                                         | <b>M</b>          | <b>SD</b>     | <b>M</b>          | <b>SD</b>     |                          |              |
| <b>Age, years</b>                       | 45.70             | 11.39         | 46.20             | 12.58         | $t(82) = 0.13$           | $p = 0.90$   |
| <b>Weight (lbs)</b>                     | 171.88            | 33.49         | 175.25            | 40.53         | $t(82) = 0.29$           | $p = 0.77$   |
| <b>Income</b>                           | 236,500           | 520,214       | 49,090            | 47,108        | $t(70) = -1.13$          | $p = 0.26$   |
| <b>BL Neuroticism<sup>a</sup></b>       | 97.81             | 24.42         | 76.60             | 19.27         | $t(82) = -2.63$          | $p = 0.01^*$ |
| <b>BL Extraversion<sup>a</sup></b>      | 105.34            | 20.05         | 111.40            | 12.60         | $t(82) = 0.93$           | $p = 0.36$   |
| <b>BL Openness<sup>a</sup> +</b>        | 135.64            | 17.96         | 128.90            | 28.35         | $t(82) = -0.73$          | $p = 0.48$   |
| <b>BL Conscientiousness<sup>a</sup></b> | 106.49            | 24.12         | 118.20            | 18.43         | $t(82) = 1.48$           | $p = 0.14$   |
| <b>BL Agreeableness<sup>a</sup></b>     | 120.36            | 14.80         | 139.10            | 9.20          | $t(82) = 3.89$           | $p < 0.01^*$ |
| <b>BL PDD</b>                           | 74.99             | 26.78         | 77.50             | 34.96         | $t(82) = 0.27$           | $p = 0.79$   |
| <b>BL PHDD</b>                          | 49.81             | 28.96         | 72.98             | 33.91         | $t(82) = 2.33$           | $p = 0.02^*$ |
| <b>BL DpD+</b>                          | 4.35              | 1.99          | 7.63              | 4.49          | $t(82) = 2.28$           | $p = 0.05^*$ |

ASAB = assigned sex at birth; <sup>a</sup> = NEO-PI at Week 0; DpD = drinks per day <sup>a</sup>= NEO; \* $p < 0.05$ ; + inequality of variance, adjusted statistics
